# Supplementary material for: Effects of Perceived Benefit on Vitamin D Supplementation Intention: A Theory of Planned Behaviour Perspective
Source: MDPI journal article supplement (doi:10.3390/ijerph19041952), 2022-02-10
Supplement: s1 [file s1]

**Items for TPB variables (after pilot test)**

| <b>Code</b> | <b>Description</b>                                                                               |
|-------------|--------------------------------------------------------------------------------------------------|
| TA1         | Regularly taking vitamin D supplement is helpful to body health                                  |
| TA2         | Regularly taking vitamin D supplement is valuable to body health                                 |
| TA3         | Regularly taking vitamin D supplement is good to maintain good health                            |
| TA4         | Regularly taking vitamin D supplement is a pleasant experience for body health                   |
| TC1         | Regularly taking vitamin D supplement is possible                                                |
| TC2         | If I wanted I could take vitamin D each day in the forthcoming month                             |
| TC3         | Regularly taking vitamin D supplement is completely out of my own control                        |
| TS1         | My family members who live with me take vitamin D supplement each day for body health            |
| TS2         | My colleagues of current job take vitamin D supplement each day for body health                  |
| TS3         | My friends since childhood take vitamin D supplement for body health                             |
| TS4         | My friends in the clubs I belonged take vitamin D supplement to maintain their body health       |
| TS5         | My friends in the healthcare industry also take vitamin D supplement to maintain their health    |
| TI1         | I will take vitamin D supplement each day for the coming month                                   |
| TI2         | Even if the cost of take vitamin D supplement becomes higher, I will continue to use it each day |
| TI3         | I plan to consume vitamin D supplement each day for the coming month                             |
| TI4         | Even if I am out of town for a journey, I will try to take vitamin D supplement each day         |
